# Supplementary material
Source: MDPI journal article supplement (https://www.mdpi.com/2071-1050/9/4/496)
Supplement: s1 [file s1]

## Contents

Table S1. Economic city profiles of 11 cities in GPRD in municipal 12<sup>th</sup> Five Year Plan

Table S2. Economic city profiles of nine cities in GPRD in municipal 13<sup>th</sup> Five Year Plan

Table S3. Economic city profile number and types of the GPRD cities in municipal Urban Master Plan

Table S4. Economic city profiles of nine cities in GPRD in municipal Land Use Plan

Table S5. Economic city profiles of nine cities in Provincial Urban Master Plan

Table S6. Economic city profiles of nine cities in Provincial 12<sup>th</sup> Five Year Plan

Table S7. Economic city profiles of nine cities in Provincial 13<sup>th</sup> Five Year Plan

Table S8. Economic city profiles of nine cities in Provincial Land Use Plan (2006–2020)

**Table S1.** Economic city profiles of 11 cities in GPRD in municipal 12<sup>th</sup> Five Year Plan.

| City      | Profile Numbers | Economic City Profiles                                                          | Economic City Profile Types              |
|-----------|-----------------|---------------------------------------------------------------------------------|------------------------------------------|
| Hong Kong | 1               | the global financial centre (Policy address 2011)                               | service city                             |
| Macau     | 3               | a world travel and leisure city (Policy address 2011)                           | Tourism city                             |
|           |                 | a city of pluralistic cultural heritage and sustainable development             | Sustainable city                         |
|           |                 | a city of quality living, with a healthy social atmosphere, a contented society | Liveable city                            |
| Guangzhou | 7               | International Trade Center                                                      | service city                             |
|           |                 | World Famous cultural City                                                      | service city                             |
|           |                 | National Innovation City                                                        | innovation city                          |
|           |                 | Comprehensive Portal City                                                       |                                          |
|           |                 | A Perfect City in Guangdong Province                                            |                                          |
| Shenzhen  | 5               | International Metropolis                                                        |                                          |
|           |                 | National Center City                                                            |                                          |
|           |                 | National Innovation City                                                        | innovation city                          |
|           |                 | City for People's livelihood and Happiness                                      |                                          |
|           |                 | National low-carbon Eco Model city                                              | low carbon city; eco city                |
| Foshan    | 6               | Model City of Socialism with Chinese characteristics                            |                                          |
|           |                 | Modern International Advanced City                                              |                                          |
|           |                 | Advanced Manufacturing Base                                                     | advanced manufacturing city              |
|           |                 | Service Center for Industry                                                     | service city                             |
|           |                 | Ling-nan Cultural City                                                          | tourism city                             |
| Dongguan  | 4               | Beautiful and Wealthy Home                                                      |                                          |
|           |                 | Garden City                                                                     | eco city                                 |
|           |                 | Green Model City                                                                | eco city                                 |
|           |                 | Modern Manufacturing City                                                       | advanced manufacturing city              |
|           |                 | Innovation & Enterprises Livable Eco-city                                       | innovation city; liveable city; eco city |
| Jiangmen  | 2               | Emerging Logistics City in the PRD                                              | service city                             |
|           |                 | National Famous Historical and Cultural City                                    | tourism city                             |
|           |                 | Selective Area for Advanced Manufacturing in the PRD                            | advanced manufacturing city              |
| Zhongshan | 3               | Livable Eco Model city                                                          | liveable city; eco city                  |
|           |                 | Livable city suitable for Innovation & Entrepreneurship                         | liveable city; innovation city           |
|           |                 | Harmonious Zhongshan                                                            |                                          |
|           |                 | Livable city                                                                    | liveable city                            |
|           |                 | Famous Cultural City                                                            | tourism city                             |

|          |   |                                                                                             |                                                    |
|----------|---|---------------------------------------------------------------------------------------------|----------------------------------------------------|
| Huizhou  | 4 | Innovation Huizhou<br>Low-carbon Huizhou<br>Cultural Huizhou<br>Harmonious Huizhou          | innovation city<br>low carbon city<br>tourism city |
| Zhaoqing | 5 | Active Zhaoqing<br>Legal City<br>Cultural Zhaoqing<br>Eco Zhaoqing<br>A city with happiness | tourism city<br>eco city                           |
| Zhuhai   | 2 | Core City in Pearl River West Bank<br>Model City for Happiness in Guangdong                 |                                                    |

**Table S2.** Economic city profiles of nine cities in GPRD in municipal 13<sup>th</sup> Five Year Plan.

| City      | Profile Numbers | City Profiles                                                                                                                                                                                                                                                                                                                                                                                                                                                                                                                                                                  | Economic City Profile Types                                                                                                                      |
|-----------|-----------------|--------------------------------------------------------------------------------------------------------------------------------------------------------------------------------------------------------------------------------------------------------------------------------------------------------------------------------------------------------------------------------------------------------------------------------------------------------------------------------------------------------------------------------------------------------------------------------|--------------------------------------------------------------------------------------------------------------------------------------------------|
| Hong Kong | 2               | Innovate for the Economy (Policy Address 2016)<br>Improve Livelihood (Policy Address 2016)                                                                                                                                                                                                                                                                                                                                                                                                                                                                                     | innovation city<br>liveable city                                                                                                                 |
| Macau     | 8               | World tourism and leisure center<br>Travel City<br>Livable City<br>Healthy City<br>Smart City<br>Cultural City<br>Legal City<br>City with Good Urban Governance                                                                                                                                                                                                                                                                                                                                                                                                                | tourism city<br>tourism city<br>liveable city<br><br>smart city<br>tourism city                                                                  |
| Guangzhou | 6               | National Center City<br>International shipping center<br>Logistics Center<br>Trade Center<br>Modern financial service system and<br>National Innovation Centre City                                                                                                                                                                                                                                                                                                                                                                                                            | service city<br>service city<br>service city<br>service city<br>innovation city                                                                  |
| Shenzhen  | 6               | International Innovation City<br>an Economic Zone in Reform and Opening Up with a<br>More Influential Role<br>National Innovation Demonstration Zone<br>National Economic center<br>International City<br>City for People's livelihood and Happiness                                                                                                                                                                                                                                                                                                                           | innovation city<br><br>innovation city                                                                                                           |
| Foshan    | 10              | the first tier manufacturing city in China<br>a city with the largest private economy in Guangdong<br>the leading city of equipment manufacturing industry<br>in the West Bank of PRD<br>a pioneer in innovation-driven city<br>a model city of industrial upgrading<br>industrial financial center city<br>a leading city where the value chain of enterprises<br>transferring from manufacturing to services<br>an important node in regional integration development<br>a model city for ecological restoration<br>the forefront city of the institutional mechanism reform | advanced manufacturing city<br><br>advanced manufacturing city<br>innovation city<br>advanced manufacturing city<br>service city<br><br>eco city |
| Dongguan  | 2               | Innovative City<br>be a node city in "One Silk One Road" area                                                                                                                                                                                                                                                                                                                                                                                                                                                                                                                  | innovation city                                                                                                                                  |

|           |   |                                                                                                                                                                                                                                                                                                                                                                                                                      |                                                                                                              |
|-----------|---|----------------------------------------------------------------------------------------------------------------------------------------------------------------------------------------------------------------------------------------------------------------------------------------------------------------------------------------------------------------------------------------------------------------------|--------------------------------------------------------------------------------------------------------------|
| Jiangmen  | 7 | an "open door" in a new round of reform and development<br>a "convenient bridge" to connect western Guangzhou with the PRD<br>a "radiation area" to Western Guangzhou, Guangxi and even the Southwest<br>a new economic center, innovation center, and urban center in West Bank of the Pearl River<br>a capital of overseas Chinese culture                                                                         | innovation city<br>tourism city                                                                              |
| Zhongshan | 4 | an idea city in the Pearl River Bay Area<br>a regional transportation hub in the West Bank of PRD<br>an important innovation and technology center<br>high-end industrial agglomeration area                                                                                                                                                                                                                         | innovation city<br>advanced manufacturing city                                                               |
| Huizhou   | 2 | National Innovative City<br>an important node city in National Innovation Demonstration Zone in the PRD                                                                                                                                                                                                                                                                                                              | innovation city<br>innovation city                                                                           |
| Zhaoqing  | 7 | a node or portal city<br>the integrated transport hub and services center in the connection between PRD and Southwest China<br>the manufacturing base in the PRD<br>an important node in national innovation demonstration zone<br>the attractive place in PRD for high-quality companies in southwest region<br>the demonstration area for national low-carbon eco development<br>the ideal livable city in the PRD | service city<br>advanced manufacturing city<br>innovation city<br>low carbon city; eco city<br>liveable city |
| Zhuhai    | 4 | International Innovative City<br>Livable City<br>National Forest City<br>demonstration city for national ecological civilization                                                                                                                                                                                                                                                                                     | innovation city<br>liveable city<br>eco city<br>eco city                                                     |

**Table S3.** Economic city profile number and types of the GPRD cities in municipal Urban Master Plan.

| City      | Profile Numbers | City Profiles                                                                                                                                                                                                                                                                                          | Economic City Profile Types                                                  |
|-----------|-----------------|--------------------------------------------------------------------------------------------------------------------------------------------------------------------------------------------------------------------------------------------------------------------------------------------------------|------------------------------------------------------------------------------|
| Hong Kong | 2               | Asia's World City (The HK2030 Planning Vision and Strategy)<br>Sustainable development                                                                                                                                                                                                                 | sustainable city                                                             |
| Macau     | 3               | Travel livable City (Macau Conceptual Planning 2007)<br>Sustainable Development Capital (Macau Conceptual Planning 2007)<br>World Vibrant City (Macau Conceptual Planning 2007)                                                                                                                        | liveable city<br>sustainable city                                            |
| Guangzhou | 8               | National Center City<br>National Historical and Cultural City<br>International Commercial center<br>External Exchange Center<br>A Leading City among livable urban and rural areas in Guangdong<br>International Metropolis<br>Comprehensive Transportation Hub<br>South International Shipping Center | tourism city<br>service city<br>service city<br>service city<br>service city |

|           |   |                                                                                                                  |                                                         |
|-----------|---|------------------------------------------------------------------------------------------------------------------|---------------------------------------------------------|
| Shenzhen  | 8 | Special Economic Zone                                                                                            |                                                         |
|           |   | National Economic Center                                                                                         |                                                         |
|           |   | International Metropolis                                                                                         |                                                         |
|           |   | National Comprehensive Reform Pilot Area                                                                         |                                                         |
|           |   | International financial, trade and shipping center under the "One country Two systems " framework with Hong Kong | service city                                            |
|           |   | National High-tech Industrial Base and Cultural Industry Base                                                    | advanced manufacturing city; service city               |
|           |   | Important National Integrated Transport Hub and Border Crossings                                                 | service city                                            |
|           |   | Famous International Tourist City                                                                                | tourism city                                            |
| Foshan    | 4 | Advanced Manufacturing Base                                                                                      | advanced manufacturing city                             |
|           |   | Service Center for Industry                                                                                      | service city                                            |
|           |   | Ling-nan Cultural City                                                                                           | tourism city                                            |
|           |   | Beautiful and Happy Home                                                                                         | tourism city                                            |
| Dongguan  | 5 | PRD Regional City Center                                                                                         |                                                         |
|           |   | National Major IT Research and Development and Industrial Base                                                   | advanced manufacturing city                             |
|           |   | Modern City                                                                                                      |                                                         |
|           |   | Light Industrial Products Manufacturing Center                                                                   |                                                         |
|           |   | Major Information Technology R&D and Production Base                                                             | advanced manufacturing city                             |
|           |   | Selective Area for Electrical Energy, Advanced Manufacturing in PRD                                              | advanced manufacturing city                             |
|           |   | Livable Eco City with Overseas Chinese Characteristics                                                           | eco city; livable city                                  |
|           |   | Important City in the West of PRD Economic Zone                                                                  |                                                         |
| Jiangmen  | 7 | One of city centers and gateways in the west of the PRD                                                          |                                                         |
|           |   | A Waterfront City with Modern Manufacturing, Trade logistics and Cultural Tourism                                | advanced manufacturing city; service city; tourism city |
|           |   | Regional Transport Hub                                                                                           | service city                                            |
|           |   | Cultural City with the representation of "Wuyi culture"                                                          | tourism city                                            |
| Zhongshan | 4 | Model City of Coordinated Development with Economic, Social, and Environmental Resources                         | eco city                                                |
|           |   | Livable Eco City for Entrepreneurship                                                                            | eco city; livable city                                  |
|           |   | High-tech Industry and Modern Manufacturing Center                                                               | advanced manufacturing city                             |
|           |   | Tourism city as the hometown of SunYat-sen                                                                       | tourism city                                            |
|           |   | Tourism City                                                                                                     | tourism city                                            |
|           |   | Famous Historical and Cultural City                                                                              | tourism city                                            |
|           |   | Civilized City                                                                                                   |                                                         |
|           |   | Livable City                                                                                                     | livable city                                            |
| Huizhou   | 9 | Petrochemical Base                                                                                               | advanced manufacturing city                             |
|           |   | Important Electronic Information Industry; Light Manufacturing Cluster in South China                            | advanced manufacturing city                             |
|           |   | Coastal city; Tourist city and a Historical and Cultural City; an Important Holiday Resort                       | tourism city                                            |
|           |   | One of City centers in the PRD                                                                                   |                                                         |
|           |   | Important Regional Transport Hub                                                                                 | service city                                            |

|          |    |                                                                             |                             |
|----------|----|-----------------------------------------------------------------------------|-----------------------------|
| Zhaoqing | 5  | Tourism Garden city                                                         | tourism city                |
|          |    | Ecological Landscape City                                                   | eco city                    |
|          |    | Modern Industrial City for Start-ups                                        | innovation city             |
|          |    | Local City Center in Guangdong Province                                     |                             |
|          |    | National Tourist city and a Historical and Cultural City                    | tourism city                |
| Zhuhai   | 14 | SAR with Ecological Civilization                                            | eco city                    |
|          |    | Model City in Scientific Development                                        |                             |
|          |    | International Liveable City                                                 | livable city                |
|          |    | Beautiful Model City in China                                               |                             |
|          |    | Special Economic Zones                                                      |                             |
|          |    | Core City in Pearl River West Bank                                          |                             |
|          |    | International Business Travel resort; Coastal Tourist City                  | tourism city                |
|          |    | National Innovation-type SEZ                                                | innovation city             |
|          |    | International Business Travel Holiday                                       | tourism city                |
|          |    | Demonstration Area for the Cooperation among Guangdong, Hong Kong and Macau |                             |
|          |    | a Modern Service Center in the West Bank of PRD                             | service city                |
|          |    | Strategic Manufacturing Base                                                | advanced manufacturing city |
|          |    | Research and Education Base; Technology Innovation Center                   | advanced manufacturing city |
|          |    | Regional Transport Hub                                                      | service city                |

**Table S4.** Economic city profiles of nine cities in GPRD in municipal Land Use Plan.

| City      | Profile Numbers | City Profiles                                                       | Economic City Profile Types |
|-----------|-----------------|---------------------------------------------------------------------|-----------------------------|
| Hong Kong | 1               | a livable high-density city                                         | Liveable city               |
| Guangzhou | 3               | National Center City                                                |                             |
|           |                 | A Perfect City in Guangdong Province                                |                             |
| Shenzhen  | 8               | International Metropolis                                            |                             |
|           |                 | A Regional Financial Center                                         | service city                |
|           |                 | A Regional Information Center                                       | service city                |
|           |                 | A Regional Business Center                                          | service city                |
|           |                 | Transportation Center                                               |                             |
|           |                 | A Regional Tourist Destination                                      | tourism city                |
|           |                 | High-tech Industrial Development and Production Base in South China | advanced manufacturing city |
|           |                 | Modern SEZ                                                          |                             |
| Foshan    | 2               | International City                                                  |                             |
|           |                 | Smart Foshan                                                        | smart city                  |
| Dongguan  | 2               | National Historical and Cultural City                               | tourism city                |
|           |                 | Regional City Center in the East of PRD                             |                             |
| Jiangmen  | 1               | Modern Manufacturing City                                           | advanced manufacturing city |
|           |                 | Selective Area for Advanced Manufacturing in the PRD                | advanced manufacturing city |
| Zhongshan | 1               | Modernized City with history of celebrity                           | tourism city                |
| Huizhou   | 1               | Pilot for synthetically township coordinated development            |                             |
| Zhaoqing  | 3               | Tourism Garden city                                                 | tourism city                |
|           |                 | Ecological Landscape City                                           | eco city                    |
|           |                 | Modern Industrial City for Start-ups                                | innovation city             |
| Zhuhai    | 3               | Core City in Pearl River West Bank                                  |                             |
|           |                 | Model City in Scientific Development                                |                             |
|           |                 | SAR with Ecological Civilization                                    | eco city                    |

**Table S5.** Economic city profiles of nine cities in Provincial Urban Master Plan.

| City      | Profile<br>Numbers |                                                                                                                                                                                                                                                                                                                                                         |
|-----------|--------------------|---------------------------------------------------------------------------------------------------------------------------------------------------------------------------------------------------------------------------------------------------------------------------------------------------------------------------------------------------------|
| Guangzhou | 6                  | National Center City<br>State-level historical and cultural city<br>Comprehensive gateway city and regional cultural and educational center<br>Guangdong Province, the political, economic and cultural center<br>Pearl River Central (Guang Zhao) metropolitan area core city                                                                          |
| Shenzhen  | 6                  | National economic center of the city<br>National innovation-oriented city<br>National economic zones<br>The country's major transportation hubs and border crossings<br>One of the economic center of Guangdong province in southern China<br>The east bank of the Pearl River Delta (deep Wan Hui) metropolitan area core city                         |
| Foshan    | 4                  | The country's major modern manufacturing base<br>Lingnan style characteristic of the national historical and cultural city and tourist city<br>Guangzhou-Foshan metropolitan area, deputy central cities<br>Western coast of the Pearl River Delta core area of radiation, the Xijiang River Basin of business, logistics center and transportation hub |
| Dongguan  | 3                  | Provincial historical and cultural city<br>The east bank of the Pearl River Delta important urban centers<br>Export-oriented economy and high-tech industries based modern manufacturing city                                                                                                                                                           |
| Jiangmen  | 5                  | National scenic tourist city<br>The famous hometown of overseas Chinese city<br>One deputy central cities of metropolitan areas in the Pearl River Delta in the West Bank and an important gateway to the Pearl River Delta to the western coastal proliferation                                                                                        |
| Zhongshan | 3                  | National historical and cultural city<br>tourist city<br>PRD deputy central metropolitan areas in the West Bank                                                                                                                                                                                                                                         |
| Huizhou   | 4                  | National scenic tourist city<br>Provincial historical and cultural city<br>PRD deputy central city district east coast city<br>Dongjiang River trade center and transportation hub                                                                                                                                                                      |
| Zhaoqing  | 4                  | National historical and cultural city and tourist city<br>Pearl River Delta northwest of the central city<br>Leading to the coastal areas of western Guangdong Pearl River Delta<br>Guangdong mountainous northwest and southwest of the major cities traffic online                                                                                    |
| Zhuhai    | 4                  | National economic zones and key entry points<br>The southeast coast of the important tourist city<br>Guangdong Province emerging science and technology base, high-tech industrial base and export base<br>Pearl River Delta in the West Bank (Pearl River) core cities and transportation hubs                                                         |

**Table S6.** Economic city profiles of nine cities in Provincial 12<sup>th</sup> Five Year Plan.

| City      | Brand Types |                                                                |
|-----------|-------------|----------------------------------------------------------------|
| Guangzhou | 10          | National Center City                                           |
|           |             | International Trade Center                                     |
|           |             | World Cultural City                                            |
|           |             | National innovation city                                       |
|           |             | Comprehensive gateway city                                     |
|           |             | Regional Cultural Education Center                             |
|           |             | National Capital livable urban and rural areas of the province |
|           |             | International metropolis                                       |
|           |             | National Outsourcing Demonstrating City                        |
|           |             | National historical and cultural city                          |
| Shenzhen  | 9           | National economic center of the city                           |
|           |             | National innovation-oriented city                              |
|           |             | SEZ                                                            |
|           |             | The National Synthetically Reform Testing District             |
|           |             | Emerging industry an important base                            |
|           |             | Demonstration city of socialism with Chinese characteristics   |
|           |             | Advanced modern international city                             |
|           |             | National Outsourcing Demonstrating City                        |
| Foshan    | 1           | National historical and cultural city                          |
| Dongguan  | 1           | National pilot city for Upgrading the processing trade         |
| Jiangmen  | 0           |                                                                |
| Zhongshan | 1           | Pilot for synthetically township coordinated development       |
| Huizhou   | 1           | Pilot for synthetically townships coordinated development      |
| Zhaoqing  | 1           | National historical and cultural city                          |
| Zhuhai    | 2           | regional central city                                          |
|           |             | regional transportation hub                                    |

**Table S7.** Economic city profiles of nine cities in Provincial 13<sup>th</sup> Five Year Plan.

| City      | Types |                                                     |
|-----------|-------|-----------------------------------------------------|
| Guangzhou | 2     | National Center City                                |
|           |       | Core Pilot Area for Comprehensive Reform Innovation |
| Shenzhen  | 2     | Innovation City                                     |
|           |       | National economic center                            |
| Foshan    | 0     |                                                     |
| Dongguan  | 0     |                                                     |
| Jiangmen  | 0     |                                                     |
| Zhongshan | 0     |                                                     |
| Huizhou   | 0     |                                                     |
| Zhaoqing  | 0     |                                                     |
| Zhuhai    | 0     |                                                     |

**Table S8.** Economic city profiles of nine cities in Provincial Land Use Plan (2006–2020).

| City      | Types |                                                  |
|-----------|-------|--------------------------------------------------|
| Guangzhou | 2     | Center City in Guangdong Province or South China |
|           |       | International Metropolis                         |
| Shenzhen  | 2     | Center City in Guangdong Province or South China |
|           |       | International Metropolis                         |
| Foshan    | 0     |                                                  |
| Dongguan  | 0     |                                                  |
| Jiangmen  | 0     |                                                  |
| Zhongshan | 0     |                                                  |
| Huizhou   | 0     |                                                  |
| Zhaoqing  | 0     |                                                  |
| Zhuhai    | 0     |                                                  |
